# Supplementary material for: FAK Shutdown: Consequences on Epithelial Morphogenesis and Biomarker Expression Involving an Innovative Biomaterial for Tissue Regeneration
Source: MDPI journal article supplement (doi:10.3390/ijms22189774), 2021-09-10
Supplement: s1 [file s1]

**Supplementary material:**

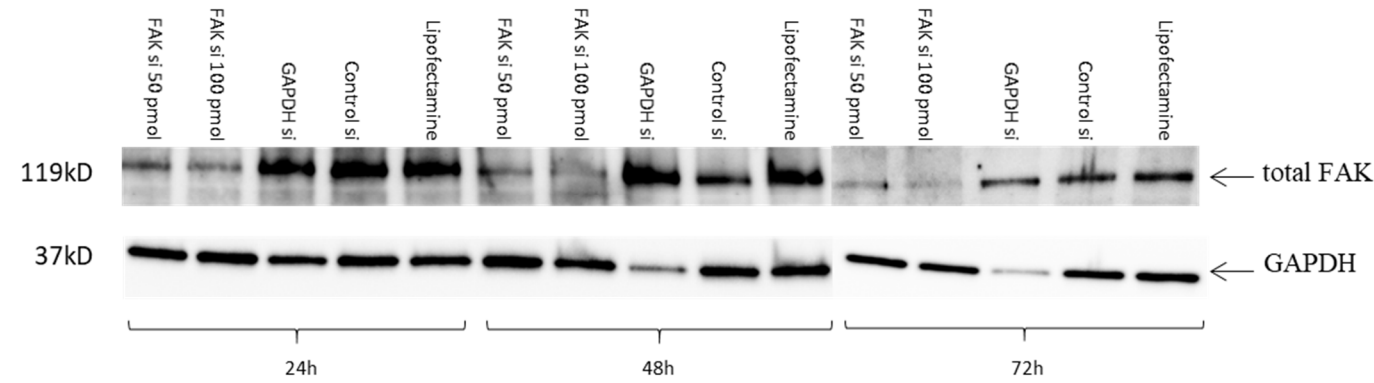

**Figure S1:** siRNA mediated FAK inhibition was determined in preliminary GKs monolayer experiments. It could be shown that application of FAK siRNA in different amounts (50 pmol = 25 nM or 100 pmol = 50 nM) led to an efficient FAK shutdown in GKs at all periods of time under investigation (24h, 48h, 72h). Lipofectamine, GAPDH siRNA, and a control siRNA served as negative controls. A representative Western blot from three biological replicates is shown.

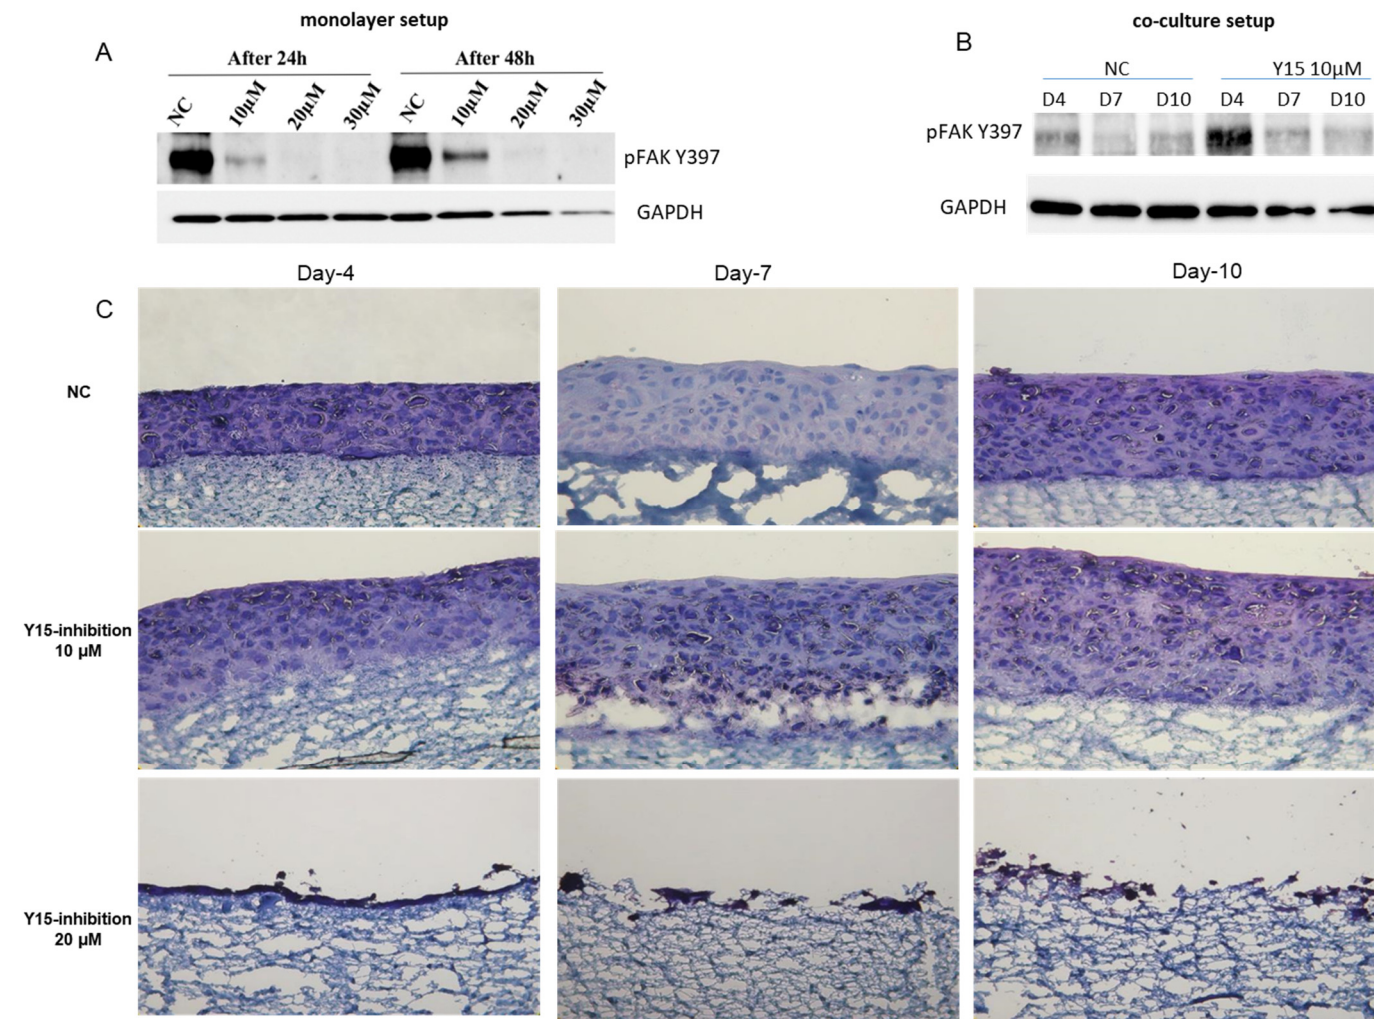

**Figure S2:** Y15-mediated inhibition of FAK in GKs-based mono- and co-cultures and the influence on pFAKY397 expression on epithelial morphology. Shown in (A) is a representative Western blot of pFAKY397 in Y15-

inhibited monolayer keratinocyte cultures. Different Y15 concentrations were tested for their efficiency to inhibit autophosphorylation of FAK at Y397 24h and 48h after inhibitor application. **(B)** GKs and GFs co-cultures were also treated with Y15 (10  $\mu$ M) and analyzed for their pFAK Y397 protein abundance after 4, 7, and 10 days of inhibitor application. Untreated keratinocytes served as negative controls in **(A)** and **(B)** and GAPDH was used as a loading control. **(C)** shows cryo-fixed and HE stained sections of Y15-treated (concentrations as indicated) co-cultures of GKs and GFs versus non-treated co-cultures at the indicated points of time. NC = negative control; D = day; three biological replicates of all experiments were conducted.

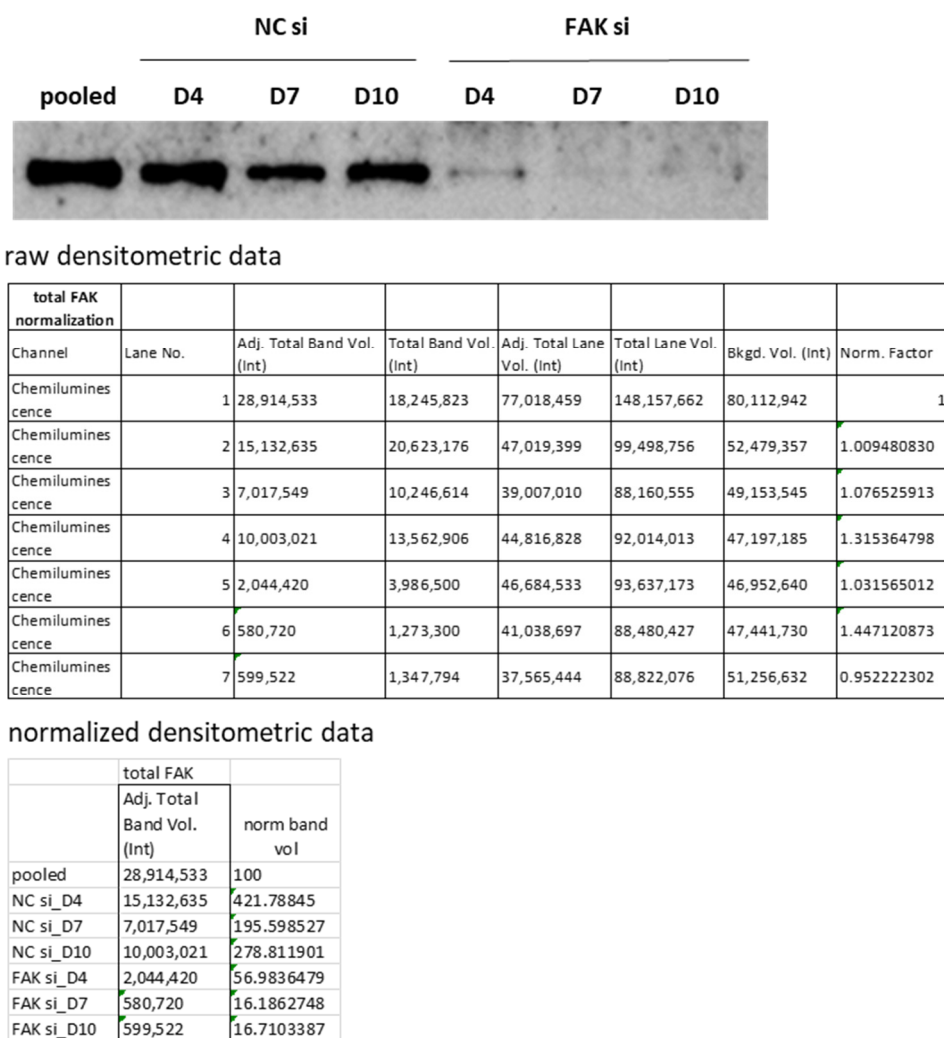

**Figure S3:** siRNA-mediated inhibition of FAK in GKs-based co-cultures. Cells were transfected with FAK-siRNA and incubated for 48h before usage in the co-culture setup for further 4, 7, or 10 days. Shown is a representative western blot result of FAKsi-RNA treated cell extracts versus control cell extracts. The densitometric raw data were obtained using the chemiluminescence application of the ChemiDoc Touch imager. The protein bands were normalized to GAPDH with ImageLab software (version 5.2.1; Bio-Rad Laboratories, USA).

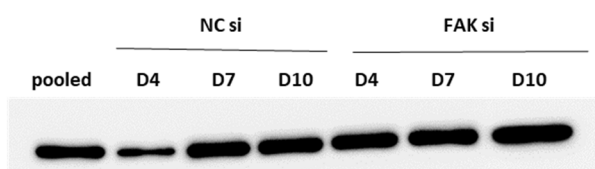

raw densitometric data

| alisa 2021-05-05_14h53m32s | IVL      |                            |                       |                            |                       |                  |              |
|----------------------------|----------|----------------------------|-----------------------|----------------------------|-----------------------|------------------|--------------|
| Channel                    | Lane No. | Adj. Total Band Vol. (Int) | Total Band Vol. (Int) | Adj. Total Lane Vol. (Int) | Total Lane Vol. (Int) | Bkgd. Vol. (Int) | Norm. Factor |
| Chemiluminescence          | 1        | 67,902,328                 | 71,034,656            | 72,951,086                 | 146,238,468           | 73,287,382       | 1            |
| Chemiluminescence          | 2        | 4,598,751                  | 23,207,886            | 25,753,002                 | 96,856,842            | 71,103,840       | 1.70008792   |
| Chemiluminescence          | 3        | 62,594,937                 | 91,536,723            | 93,412,227                 | 164,570,925           | 71,158,698       | 1.37543374   |
| Chemiluminescence          | 4        | 78,150,560                 | 88,128,240            | 90,873,720                 | 160,337,160           | 69,463,440       | 1.203817636  |
| Chemiluminescence          | 5        | 88,991,115                 | 92,507,931            | 94,672,854                 | 165,811,134           | 71,138,280       | 1.07389986   |
| Chemiluminescence          | 6        | 98,589,120                 | 102,478,040           | 104,404,616                | 183,161,400           | 78,756,784       | 0.991056718  |
| Chemiluminescence          | 7        | 130,946,260                | 136,047,916           | 37,644,664                 | 109,272,768           | 71,628,104       | 0.970109071  |

normalized densitometric data

|            | IVL                        |               |
|------------|----------------------------|---------------|
|            | Adj. Total Band Vol. (Int) | norm band vol |
| gepooled   | 67,902,328                 | 85.11975651   |
| NC si_D4   | 4,598,751                  | 50.29189249   |
| NC si_D7   | 62,594,937                 | 198.5605322   |
| NC si_D10  | 78,150,560                 | 188.6601004   |
| FAK si_D4  | 88,991,115                 | 226.3630835   |
| FAK si_D7  | 98,589,120                 | 221.3502395   |
| FAK si_D10 | 130,946,260                | 268.8924796   |

**Figure S4:** siRNA-mediated inhibition of FAK in GKs-based co-cultures and the influence on involucrin (IVL) expression. Cells were transfected with FAK-siRNA and incubated for 48h before usage in the co-culture setup for further 4, 7, or 10 days. Shown is a representative western blot result of FAKsi-RNA treated cell extracts versus control cell extracts. The densitometric raw data were obtained using the chemiluminescence application of the ChemiDoc Touch imager. The protein bands were normalized to GAPDH with ImageLab software (version 5.2.1; Bio-Rad Laboratories, USA).
